# Supplementary material
Source: Royal Society of Chemistry journal article supplement (doi:10.1039/d6py00121a)
Supplement: d6py00121a1.pdf [file d6py00121a1.pdf]

**Electronic supplementary information (ESI) for**

**Achieving high lignin content and mechanical enhancement in  
biobased thermosets via a high-molecular-weight soybean oil skeleton**

Ying Lin,<sup>\*a,d</sup> Kangyong Xu,<sup>a</sup> Puyou Jia,<sup>\*c</sup> Shenglong Liao,<sup>a</sup> Qingping Song,<sup>a</sup> Ye  
Sha<sup>\*b</sup>

<sup>a</sup> Anhui Laboratory of Clean Catalytic Engineering, School of Chemical and  
Environmental Engineering, Anhui Polytechnic University, Wuhu 241000, P. R.  
China

<sup>b</sup> Department of Chemistry and Material Science, College of Science, Nanjing  
Forestry University, Nanjing 210037, P. R. China

<sup>c</sup> Institute of Chemical Industry of Forest Products, Chinese Academy of Forestry  
(CAF), 16 Suojin North Road, Nanjing 210042, P. R. China

<sup>d</sup> State Key Laboratory of Coordination Chemistry, School of Chemistry, Nanjing  
University, Nanjing 210023, P. R. China

\* E-mail: [linyin@ahpu.edu.cn](mailto:linyin@ahpu.edu.cn) (Y. Lin); [shaye@njfu.edu.cn](mailto:shaye@njfu.edu.cn) (Y. Sha); [jiapuyou@icifp.cn](mailto:jiapuyou@icifp.cn)  
(P. Jia)

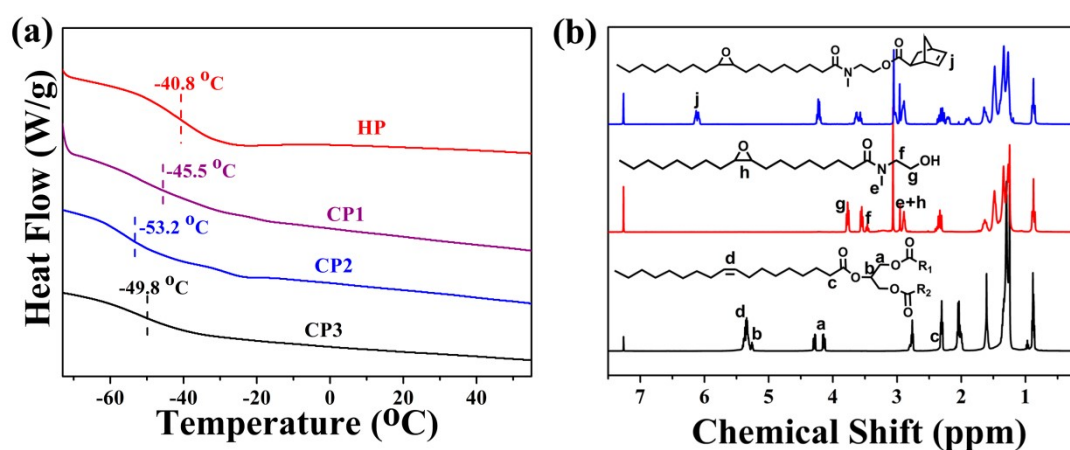

**Figure S1.** (a) DSC curves of homopolymer (HP) and copolymers (CP1-CP3). (b)  $^1\text{H}$  NMR spectra of soybean oil, SBOH and NS monomer.

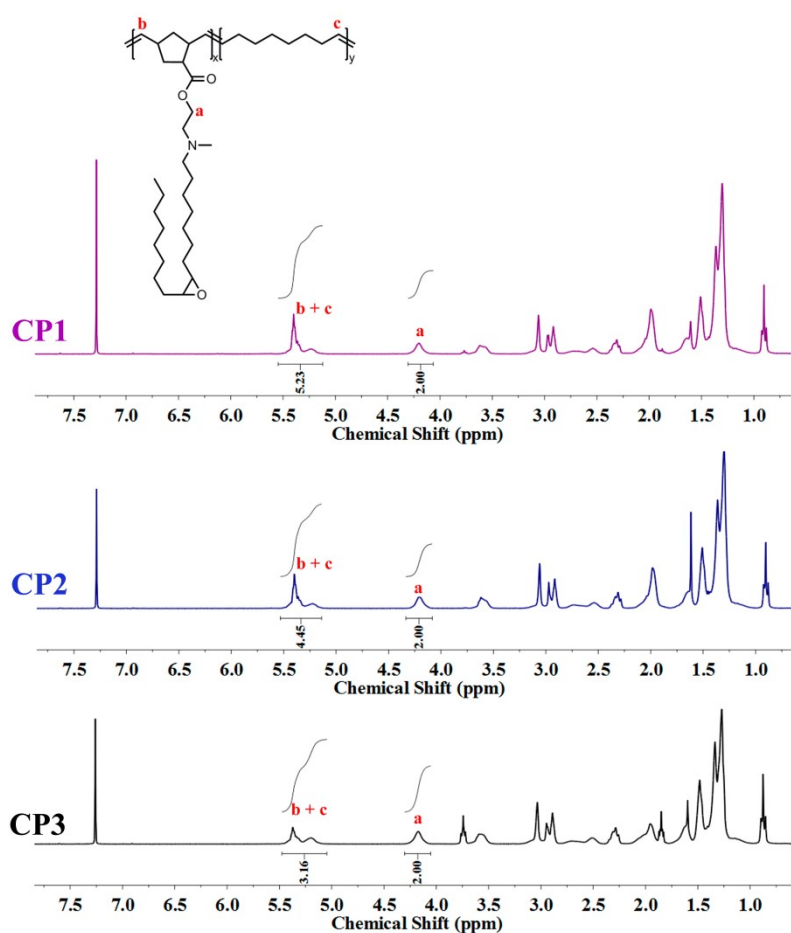

**Figure S2.**  $^1\text{H}$  NMR spectra of copolymers (CP1 - CP3) with different soybean oil unit contents.

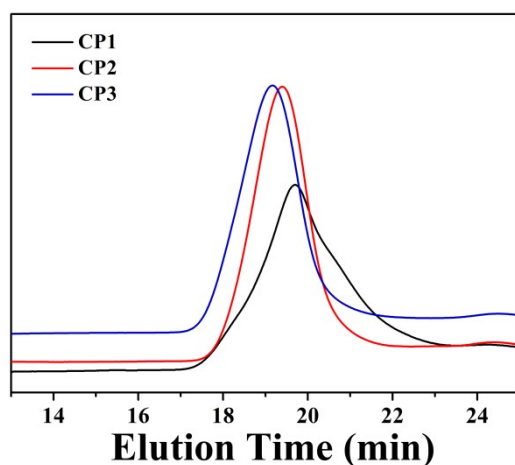

**Figure S3.** GPC traces of copolymers.

**Table S1.** Degrees of curing of HP-LX thermosets with various weight fractions of lignin.

| Sample code | Time (h) | $T_{\text{peak}}$ (°C) | $\Delta H_{\text{rxn}}$ (J/g) | $\Delta H_{\text{t}}$ (J/g) | Degree of curing |
|-------------|----------|------------------------|-------------------------------|-----------------------------|------------------|
| HP-L12.5    | 2        | $199.9 \pm 1.4$        | $34.6 \pm 1.5$                | $1.49 \pm 0.4$              | 95.7 %           |
| HP-L30      | 2        | $194.9 \pm 0.14$       | $45.2 \pm 4.9$                | $3.88 \pm 0.3$              | 91.4 %           |
| HP-L40      | 2        | $192.4 \pm 2.5$        | $41.7 \pm 2.3$                | $1.88 \pm 0.6$              | 95.5 %           |
| HP-L50      | 2        | $204.4 \pm 1.6$        | $52.1 \pm 3.4$                | $6.88 \pm 0.3$              | 86.8 %           |

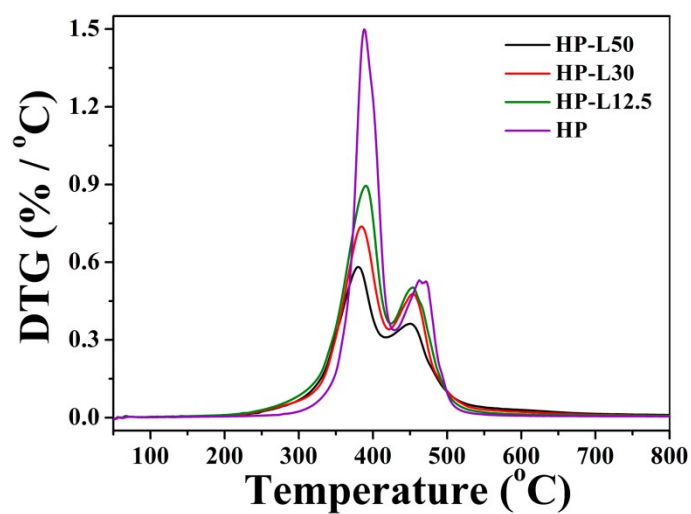

**Figure S4.** DTG curves of HP and HP-LX thermosets.

**Table S2.** Mechanical properties of HP-LX thermosets.

| Sample code | Tensile strength (MPa) | Strain at break (%) | Young's modulus (MPa)* | Toughness (MJ/m <sup>3</sup> ) |
|-------------|------------------------|---------------------|------------------------|--------------------------------|
| HP-L12.5    | 8.95 ± 0.2             | 35.1 ± 3.2          | 53.1 ± 1.61            | 2.01 ± 0.2                     |
| HP-L30      | 22.4 ± 1.1             | 12.6 ± 1.8          | 268.7 ± 4.75           | 1.51 ± 0.1                     |
| HP-L40      | 23.1 ± 0.8             | 8.7 ± 0.5           | 389.3 ± 3.85           | 1.28 ± 0.2                     |
| HP-L50      | 24.4 ± 1.5             | 5.1 ± 0.3           | 664.3 ± 6.71           | 0.74 ± 0.08                    |

\*Young's Modulus calculated for the linear response until 2% elongation.

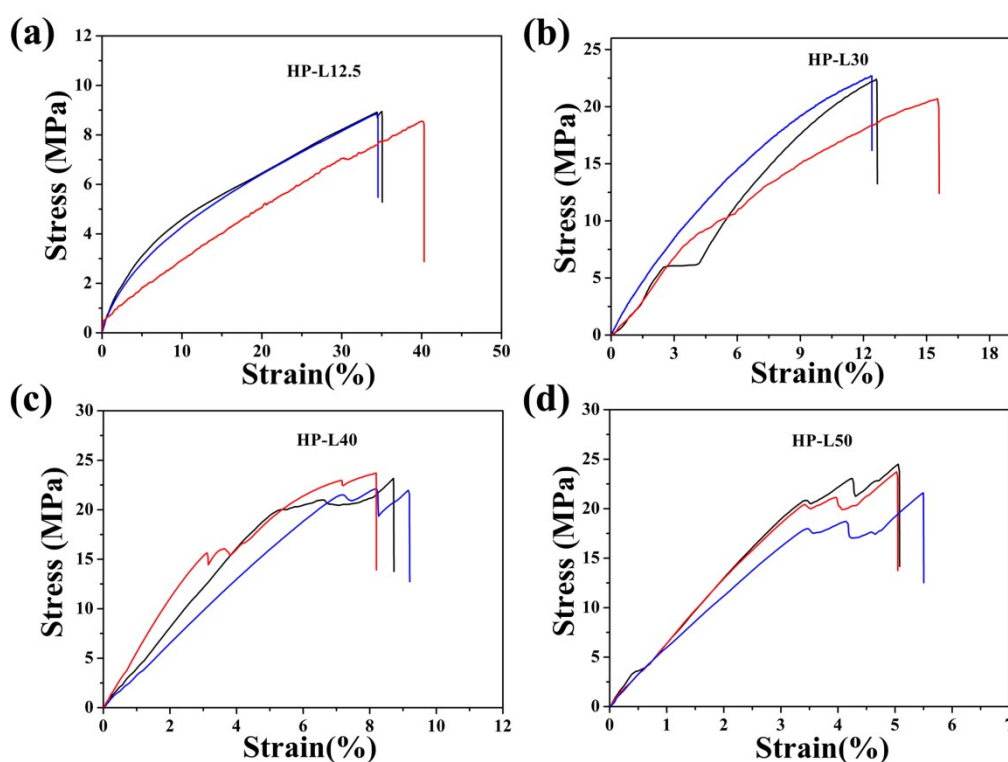

**Figure S5.** (a) Stress-strain curves of HP-LX thermosets. (a) HP-L12.5, (b) HP-L30, (c) HP-L40, (d) HP-L50. Different colored curves represent different specimens of the same sample.

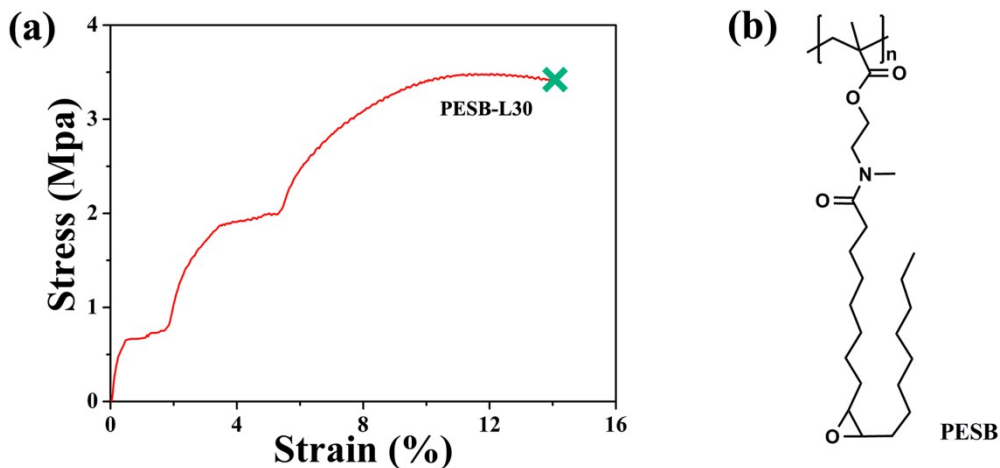

**Figure S6.** (a) Stress-strain curve of PESB-L30 thermoset. (b) Chemical structure of PESB with low molecular weight.

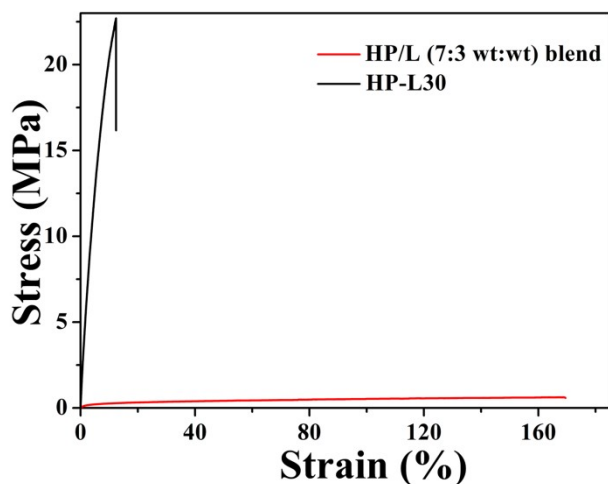

**Figure S7.** Stress-strain curves of HP-L30 thermoset and HP/L blend at identical feeding ratios.

**Table S3.** Dynamic mechanical properties and cross-linking density ( $\nu_e$ ) of HP-LX thermosets.

| Sample code | $E'$ at 25 °C (MPa) | $E'$ at $T_g+30$ °C (MPa) | $T_g$ (°C) | $\nu_e$ (mol/m <sup>3</sup> ) |
|-------------|---------------------|---------------------------|------------|-------------------------------|
| HP-L12.5    | 161.8               | 12.02                     | 35.08      | 1430                          |
| HP-L30      | 1721.2              | 41.27                     | 74.6       | 4382                          |
| HP-L40      | 1672.7              | 38.9                      | 85.68      | 4013                          |
| HP-L50      | 2032.5              | 56.98                     | 121.56     | 5381                          |

**Table S4.** Mechanical properties of HP-L30 and CP-L30 thermosets.

| Sample code | Tensile strength (MPa) | Strain at break (%) | Young's modulus (MPa)* | Toughness (MJ/m <sup>3</sup> ) |
|-------------|------------------------|---------------------|------------------------|--------------------------------|
| HP-L30      | 22.4 ± 1.1             | 12.6 ± 1.8          | 268.7 ± 4.75           | 1.51 ± 0.1                     |
| CP1-L30     | 4.9 ± 0.2              | 52.3 ± 3.2          | 21.6 ± 0.28            | 1.40 ± 0.2                     |
| CP2-L30     | 8.5 ± 0.3              | 78.9 ± 2.1          | 44.1 ± 0.34            | 3.83 ± 0.3                     |
| CP3-L30     | 13.9 ± 0.7             | 3.3 ± 0.1           | 531.1 ± 1.69           | 0.26 ± 0.05                    |

\*Young's Modulus calculated for the linear response until 2% elongation.

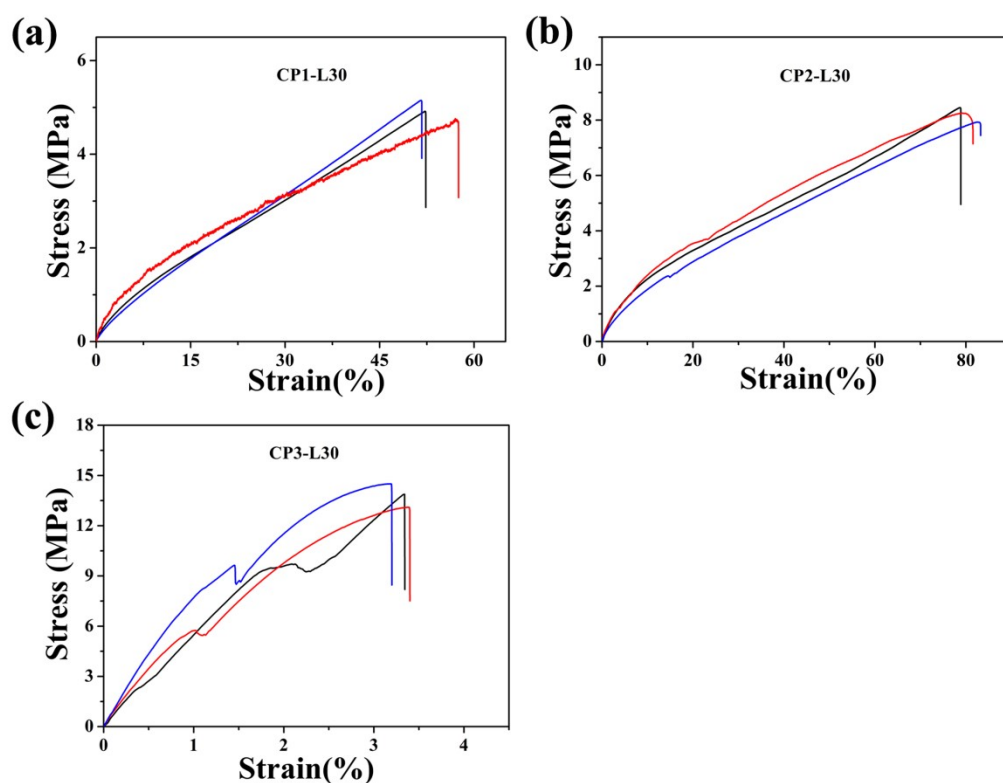

**Figure S8.** (a) Stress-strain curves of CP-L30 thermosets. (a) CP1-L30, (b) CP2-L30, (c) CP3-L30. Different colored curves represent different specimens of the same sample.

**Table S5.** Dynamic mechanical properties and cross-linking density ( $\nu_e$ ) of CP-L30 thermosets.

| Sample code | $E'$ at 25 °C<br>(MPa) | $E'$ at $T_g+30$ °C<br>(MPa) | $T_g$ (°C) | $\nu_e$ (mol/m <sup>3</sup> ) |
|-------------|------------------------|------------------------------|------------|-------------------------------|
| CP1-L30     | 197.0                  | 8.89                         | 44.2       | 1027                          |
| CP2-L30     | 188.1                  | 15.3                         | 49.2       | 1742                          |
| CP3-L30     | 566.2                  | 18.83                        | 59.8       | 2081                          |

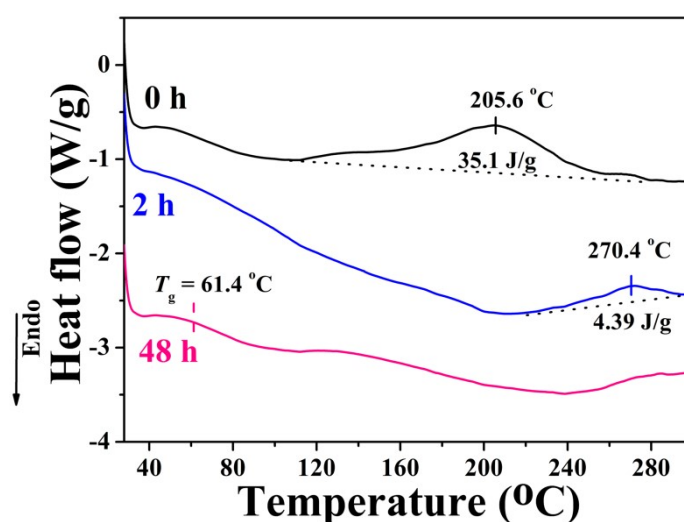

**Figure S9.** CP2-L30 system after curing at 110 °C for 0, 2 and 48 h.

**Table S6.** Degrees of curing of CP2-LX thermosets with various weight fractions of lignin.

| Sample code | Time (h) | $T_{peak}$ (°C) | $\Delta H_{rxn}$ (J/g) | $\Delta H_t$ (J/g) | Degree of curing |
|-------------|----------|-----------------|------------------------|--------------------|------------------|
| CP2-L30     | 2        | 205.6 ± 0.3     | 35.1 ± 2.7             | 4.39 ± 2.1         | 87.5%            |
| CP2-L40     | 2        | 205.7 ± 0.6     | 38.1 ± 3.9             | 3.87 ± 1.6         | 89.8%            |
| CP2-L50     | 2        | 208.8 ± 4.4     | 42.2 ± 1.7             | 6.77 ± 3.3         | 83.9%            |

**Table S7.** Mechanical properties of CP2-LX thermosets.

| Sample code | Tensile strength (MPa) | Strain at break (%) | Young's modulus (MPa)* | Toughness (MJ/m <sup>3</sup> ) |
|-------------|------------------------|---------------------|------------------------|--------------------------------|
| CP2-L30     | 8.5 ± 0.3              | 78.9 ± 2.1          | 44.1 ± 0.34            | 3.83 ± 0.3                     |
| CP2-L40     | 12.9 ± 1.1             | 25.4 ± 1.0          | 144.2 ± 2.32           | 2.06 ± 0.1                     |
| CP2-L50     | 27.9 ± 1.3             | 10 ± 0.2            | 489.5 ± 9.0            | 1.95 ± 0.1                     |

\*Young's Modulus calculated for the linear response until 2% elongation.

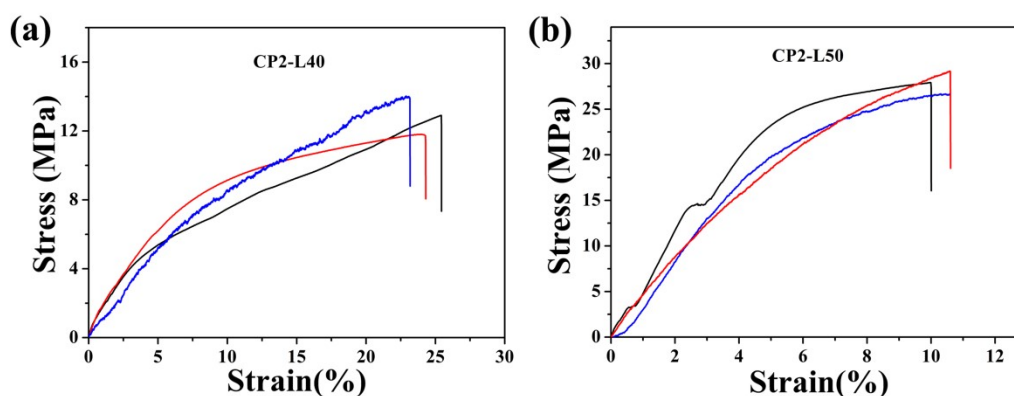**Figure S10.** (a) Stress-strain curves of CP2-LX thermosets. (a) CP2-L40, (b) CP2-L50. Different colored curves represent different specimens of the same sample.**Table S8.** Dynamic mechanical properties and cross-linking density ( $\nu_e$ ) of CP2-LX thermosets.

| Sample code | $E'$ at 25 °C (MPa) | $E'$ at $T_g$ +30 °C (MPa) | $T_g$ (°C) | $\nu_e$ (mol/m <sup>3</sup> ) |
|-------------|---------------------|----------------------------|------------|-------------------------------|
| CP2-L30     | 188.1               | 15.3                       | 49.2       | 1742                          |
| CP2-L40     | 519.0               | 38.3                       | 50.8       | 4340                          |
| CP2-L50     | 1274.3              | 93.58                      | 70.6       | 10043                         |
